# Supplementary material
Source: Springer Nature journal article supplement (https://www.springermedizin.de/resource/supplementary/13031_2009_49_MOESM1_ESM.pdf/9645044)

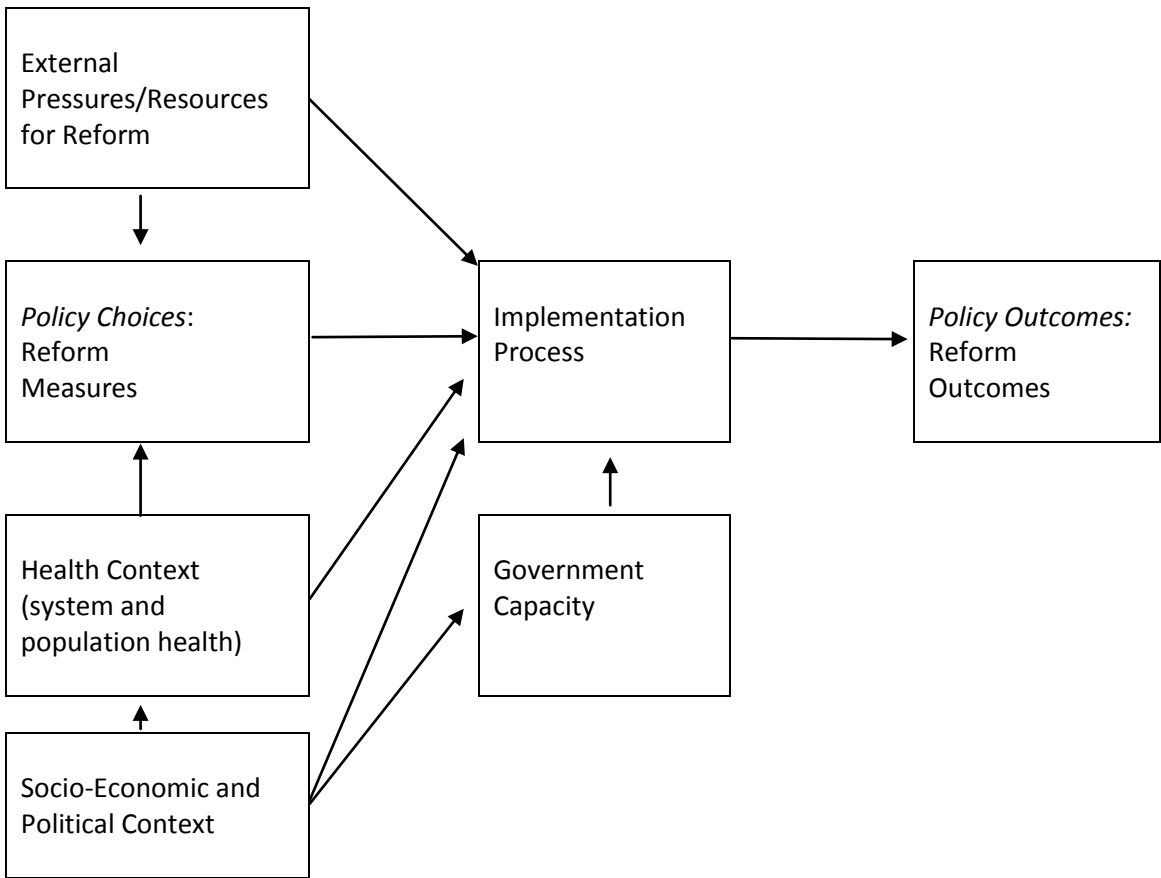

Supplement: MOESM1 [file 9645044]
